# Supplementary material for: Was the Risk from Nursing-Home Evacuation after the Fukushima Accident Higher than the Radiation Risk?
Source: PLOS journal article supplement (doi:10.1371/journal.pone.0137906), 2015-09-11
Supplement: S3 (10.1371/journal.pone.0137906.s003) [file journal.pone.0137906.s003]

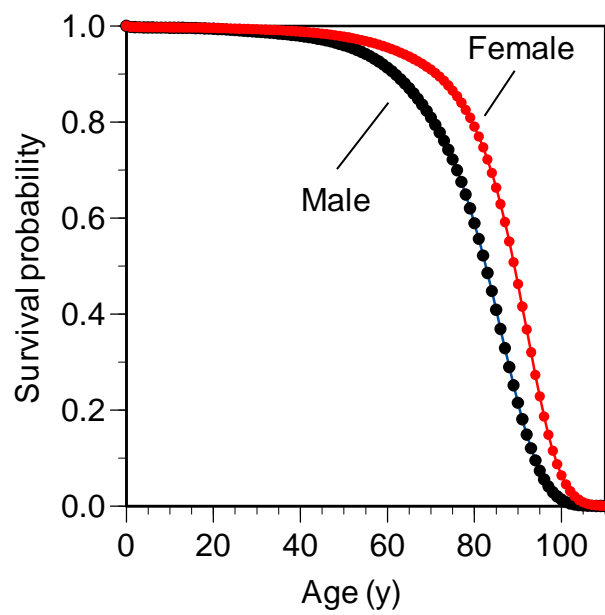

S3 Fig. Survival probabilities of Japanese males and females.
